# Supplementary material
Source: ML conference proceedings conference paper supplement (https://openreview.net/forum?id=isWKA4rdXx)
Supplement: supplementary_material [file appendix.pdf › appendix.pdf]

## A TASK SPLITS

To evaluate the generalization capabilities of our approach, we curated distinct sets of training and testing scenarios for each environment. The specific scenarios comprising each train/test split are detailed in [Table 2](#).

Table 2: **Train/Test Task Splits for All Environments.** We list the specific scenarios used for training and out-of-distribution generalization testing.

| Environment | Split | # of Tasks | Scenarios                                                                                                                                                                          |
|-------------|-------|------------|------------------------------------------------------------------------------------------------------------------------------------------------------------------------------------|
| LBF         | Train | 5          | {8x8-2p-2f, 10x10-3p-3f, 15x15-3p-5f, 15x15-4p-5f, 16x16-5p-6f}                                                                                                                    |
|             | Test  | 4          | {12x12-4p-5f, 14x14-3p-3f, 17x17-6p-8f, 17x17-8p-10f}                                                                                                                              |
| RWARE       | Train | 15         | {tiny-2ag, tiny-4ag, tiny-8ag, small-2ag, small-4ag, small-16ag, small-32ag, medium-8ag, medium-32ag, large-16ag, xlarge-8ag, xlarge-32ag, giant-32ag, colossal-8ag, titanic-16ag} |
|             | Test  | 7          | {tiny-16ag, medium-2ag, medium-16ag, xlarge-16ag, colossal-32ag, titanic-8ag, titanic-32ag}                                                                                        |
| Connector   | Train | 10         | {12x12x4a, 15x15x3a, 18x18x4a, 21x21x5a, 24x24x6a, 27x27x7a, 30x30x10a, 33x33x11a, 36x36x12a, 39x39x13a}                                                                           |
|             | Test  | 11         | {42x42x18a, 45x45x23a, 48x48x20a, 51x51x28a, 54x54x30a, 57x57x32a, 60x60x33a, 63x63x35a, 66x66x40a, 69x69x43a, 72x72x45a}                                                          |

## B DATASET QUALITY ABLATION

**Do higher quality trajectories improve generalisation?** As observed in [subsection 3.4](#), increasing dataset size does not lead to significant improvements in generalization to unseen tasks. A natural follow-up question is: *how does the quality of trajectories in the dataset affect training and test performance?* To investigate this, we conduct an experiment where training is performed with trajectories sampled from specific subsets of our dataset. Low-quality trajectories are those collected during the first two-thirds of the online training phase, while High-quality trajectories are those from the final third. Results on RWARE are shown in [Figure 7](#). For all algorithms, training performance improves with High-quality trajectories, though the gains on test tasks remain marginal. Across all three algorithms, training with Low-quality trajectories consistently yields the worst results on both training and test tasks. These results suggest that the most effective strategy is to prioritize High-quality trajectories while retaining a small fraction of Low-quality ones as negative examples.

## C HYPERPARAMETERS

This section details the hyperparameters used for our experiments. [Table 3](#) lists the network architecture and environment-specific settings. The default training parameters are provided in [Table 4](#). Finally, algorithm-specific settings for MT-Oryx and MT-CQL-Sable are presented in [Table 5](#) and [Table 6](#), respectively.

Table 3: Default network settings for each environment.

| Parameter                    | LBF       | Connector | RWARE       |
|------------------------------|-----------|-----------|-------------|
| Model embedding dimension    | 512       | 512       | 512         |
| Number of transformer heads  | 4         | 4         | 4           |
| Number of transformer blocks | 1         | 1         | 1           |
| HL-Gauss value support       | $[-1, 1]$ | $[-1, 1]$ | $[-20, 20]$ |
| HL-Gauss number of bins      | 51        | 51        | 51          |
| Sable’s decay scaling factor | 0.8       | 0.8       | 0.8         |

Table 4: Default training settings.

| Hyperparameter                          | Value              |
|-----------------------------------------|--------------------|
| Number of training updates              | 60 000             |
| Number of evaluations                   | 600                |
| Number of evaluation episodes           | 32                 |
| Number of absolute evaluation episodes  | 320                |
| Learning rate                           | $1 \times 10^{-3}$ |
| Discount ( $\gamma$ )                   | 0.99               |
| Polyak averaging coefficient ( $\tau$ ) | 0.005              |
| Maximum gradient norm                   | 10                 |
| Sample sequence length                  | 20                 |
| Sample batch size                       | 480                |
| Value temperature                       | 1000               |
| Policy temperature                      | 0.1                |
| Critic loss coefficient                 | 1                  |

Table 5: MT-Oryx specific settings.

| Hyperparameter           | Value |
|--------------------------|-------|
| Value temperature        | 1000  |
| Policy temperature       | 0.1   |
| Critic loss coefficient  | 1     |
| HL-Gauss smoothing ratio | 0.75  |

Table 6: MT-CQL-Sable specific settings.

| Hyperparameter           | Value |
|--------------------------|-------|
| CQL loss coefficient     | 10    |
| HL-Gauss smoothing ratio | 0.75  |

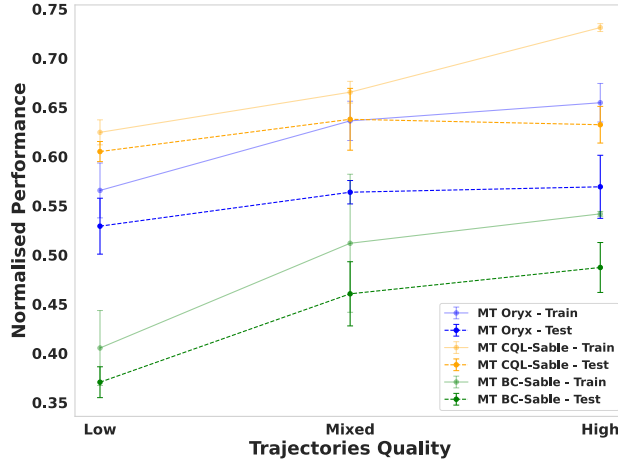

Figure 7: Performance of MT-Oryx, MT-CQL-Sable, and MT-BC-Sable on RWARE with different trajectory subsets. High-quality trajectories improve training performance, particularly for MT-CQL-Sable, but these gains do not transfer to the test tasks. Low-quality trajectories consistently yield the worst results.

## D DATASETS

### D.1 DATASET RELEASE PLAN

To guarantee the long-term reproducibility of this project, we will upload all of our datasets to a public HuggingFace repository<sup>2</sup>. This will be done upon publication of this work.

### D.2 DATASET STATISTICS

The following sections detail the statistics of the offline datasets for the RWARE, Connector, and LBF environments used in our experiments. Datasets were generated by recording rollouts from an online Sable (Mahjoub et al., 2025) agent at different intervals during its training. All data is collected from fixed intervals over training using an evaluation policy to vary the amount of data collected while maintaining a standard set of policies to sample from. For RWARE, we also create multiple datasets of different sizes by varying the number of evaluations sampled in order to perform our data-scaling experiments.

#### D.2.1 RWARE

For our data-scaling experiments in the RWARE environment, we generated three offline datasets of varying sizes. The datasets were constructed by collecting 122, 244, and 610 evaluation rollouts from a pre-trained online Sable agent (Mahjoub et al., 2025). Table 7 provides detailed statistics for each dataset size across all RWARE scenarios, illustrating how the number of episodes and transitions scales with the number of collected rollouts.

#### D.2.2 CONNECTOR

For the Connector environment, we generated 10 distinct offline datasets, one for each training scenario. Each dataset contains approximately 10 million transitions. The data collection process involved recording evaluation rollouts at 50 different checkpoints during the training of an online Sable agent. At each checkpoint, we generated 160 rollouts of 1280 timesteps each, resulting in a total of  $50 \times 160 \times 1280 \approx 10.24$  million transitions per scenario. The ten scenarios used to create these datasets are listed in Table 9.

<sup>2</sup><https://sites.google.com/view/multi-task-marl>

### D.2.3 LBF

For LBF we collected all the the training data from an online Sable run for each LBF scenario.

Table 7: **RWARE dataset statistics across different data collection checkpoints.** We report the total number of episodes and timesteps (transitions) for each scenario, corresponding to datasets created from 122, 244, and 610 evaluation rollouts.

| Scenario Name | 122 Rollouts |           | 244 Rollouts |            | 610 Rollouts |            |
|---------------|--------------|-----------|--------------|------------|--------------|------------|
|               | Episodes     | Timesteps | Episodes     | Timesteps  | Episodes     | Timesteps  |
| tiny-2ag      | 15,616       | 7,493,913 | 31,232       | 14,934,862 | 78,080       | 37,382,071 |
| small-2ag     | 15,616       | 7,511,771 | 31,232       | 15,091,627 | 78,080       | 37,504,501 |
| tiny-4ag      | 15,616       | 6,492,381 | 31,232       | 13,208,433 | 78,080       | 33,110,502 |
| small-4ag     | 15,616       | 6,611,283 | 31,232       | 13,496,720 | 78,080       | 33,733,571 |
| tiny-8ag      | 15,616       | 4,704,862 | 31,232       | 9,748,756  | 78,080       | 24,647,669 |
| medium-8ag    | 15,616       | 2,502,476 | 31,232       | 5,148,947  | 78,080       | 12,747,091 |
| xlarge-8ag    | 15,616       | 5,816,385 | 31,232       | 11,008,538 | 78,080       | 29,167,762 |
| colossal-8ag  | 15,616       | 4,804,325 | 31,232       | 12,078,452 | 78,080       | 29,830,317 |
| small-16ag    | 15,616       | 3,681,321 | 31,232       | 7,405,046  | 78,080       | 15,598,958 |
| large-16ag    | 15,616       | 3,946,296 | 31,232       | 6,158,419  | 78,080       | 18,731,422 |
| titanic-16ag  | 15,616       | 4,361,204 | 31,232       | 10,498,182 | 78,080       | 17,223,581 |
| small-32ag    | 15,616       | 317,038   | 31,232       | 639,868    | 78,080       | 207,539    |
| medium-32ag   | 15,616       | 4,147,400 | 31,232       | 8,386,685  | 78,080       | 20,855,336 |
| xlarge-32ag   | 15,616       | 3,275,217 | 31,232       | 6,593,539  | 78,080       | 16,388,466 |
| giant-32ag    | 15,616       | 3,682,013 | 31,232       | 6,513,235  | 78,080       | 12,706,872 |

Table 8: **Connector dataset statistics.** We generated a separate dataset of approximately 10.24 million transitions for each of the ten training scenarios.

| Scenario Name | Total Timesteps             |
|---------------|-----------------------------|
| 12x12x4a      | $\approx 10.24 \times 10^6$ |
| 15x15x3a      | $\approx 10.24 \times 10^6$ |
| 18x18x4a      | $\approx 10.24 \times 10^6$ |
| 21x21x5a      | $\approx 10.24 \times 10^6$ |
| 24x24x6a      | $\approx 10.24 \times 10^6$ |
| 27x27x7a      | $\approx 10.24 \times 10^6$ |
| 30x30x10a     | $\approx 10.24 \times 10^6$ |
| 33x33x11a     | $\approx 10.24 \times 10^6$ |
| 36x36x12a     | $\approx 10.24 \times 10^6$ |
| 39x39x13a     | $\approx 10.24 \times 10^6$ |

Table 9: **LBF dataset statistics.** We generated a separate dataset of approximately 4 million transitions for each of the 5 training scenarios.

| Scenario Name | Total Timesteps            |
|---------------|----------------------------|
| 8x8-2p-2f     | $\approx 3.99 \times 10^6$ |
| 10x10-3p-3f   | $\approx 3.99 \times 10^6$ |
| 15x15-3p-3f   | $\approx 3.99 \times 10^6$ |
| 15x15-4p-5f   | $\approx 3.99 \times 10^6$ |
| 16x16-5p-6f   | $\approx 3.99 \times 10^6$ |
